# Supplementary material for: Iso-nitrous acid: spectral frequencies and possible synthetic pathwaysElectronic Supplementary Information available. See http://www.rsc.org/suppdata/cp/b1/b107637j/
Source: Royal Society of Chemistry journal article supplement (doi:10.1039/b107637j), 2002-01-17
Supplement: table_s1.pdf [file table_s1.pdf]

**Table S1** Supplementary data: total BHandHLYP/6-311G\*\* energies ( $E$ ) and zero point energies ( $zpe$ ), both in a.u., of reactants and products; also, molecular symmetries and (for radicals) electronic states

|                    | symmetry                                      | $E$        | $zpe$  |                                 | symmetry                                      | $E$        | $zpe$  |
|--------------------|-----------------------------------------------|------------|--------|---------------------------------|-----------------------------------------------|------------|--------|
| H <sub>2</sub>     | D <sub>∞h</sub>                               | -1.1695    | 0.0103 | H                               | K <sub>h</sub> / <sup>2</sup> S               | -0.5000    |        |
| HO <sub>2</sub>    | C <sub>s</sub> / <sup>2</sup> A''             | -150.8716  | 0.0150 | O <sub>2</sub>                  | D <sub>∞h</sub> / <sup>3</sup> Σ <sub>g</sub> | -150.2888  | 0.0041 |
| HCHO               | C <sub>2v</sub>                               | -114.4688  | 0.0277 | HO <sub>2</sub> NO <sub>2</sub> | C <sub>1</sub> / <sup>1</sup> A               | -355.9093  | 0.0315 |
| H <sub>2</sub> O   | C <sub>2v</sub>                               | -76.4054   | 0.0222 | HCO                             | C <sub>s</sub> / <sup>2</sup> A'              | -113.8221  | 0.0136 |
| CH <sub>3</sub> OH | C <sub>s</sub>                                | -115.6869  | 0.0531 | OH                              | D <sub>∞h</sub> / <sup>2</sup> Π              | -75.7235   | 0.0088 |
| H <sub>2</sub> S   | C <sub>2v</sub>                               | -399.3951  | 0.0156 | CH <sub>3</sub> O               | C <sub>s</sub> / <sup>2</sup> A'              | -115.0232  | 0.0380 |
| HBr                | C <sub>∞v</sub>                               | -2574.7073 | 0.0062 | CH <sub>2</sub> OH              | C <sub>1</sub> / <sup>2</sup> A               | -115.0289  | 0.0386 |
| HI                 | C <sub>∞v</sub>                               | -11.9548   | 0.0053 | SH                              | D <sub>∞h</sub> / <sup>2</sup> Π              | -398.7520  | 0.0063 |
| NO <sub>2</sub>    | C <sub>2v</sub> / <sup>2</sup> A <sub>1</sub> | -205.0119  | 0.0094 | Br                              | K <sub>h</sub> / <sup>2</sup> P               | -2574.0681 |        |
|                    |                                               |            |        | I                               | K <sub>h</sub> / <sup>2</sup> P               | -11.3432   |        |
|                    |                                               |            |        | <i>trans</i> -HONO              | C <sub>s</sub>                                | -205.6422  | 0.0217 |
|                    |                                               |            |        | <i>cis</i> -HONO                | C <sub>s</sub>                                | -205.6433  | 0.0218 |
|                    |                                               |            |        | H-NO <sub>2</sub>               | C <sub>2v</sub>                               | -205.6292  | 0.0234 |

Note:

For the H atom, the exact value is used for all levels of theory: values for HI and I are from the BHandHLYP/SDD method.
