# Supplementary material for: Iso-nitrous acid: spectral frequencies and possible synthetic pathwaysElectronic Supplementary Information available. See http://www.rsc.org/suppdata/cp/b1/b107637j/
Source: Royal Society of Chemistry journal article supplement (doi:10.1039/b107637j), 2002-01-17
Supplement: table_s2.pdf [file table_s2.pdf]

**Table S2** Supplementary data: total BHandHLYP/6-311G\*\* energies ( $E$ ) and zero point energies ( $zpe$ ), both in a.u., of transition state structures; also, molecular symmetries and (for radicals) electronic states, together with imaginary and 1st harmonic frequencies in  $\text{cm}^{-1}$

|     |                                                                                           | sym              | $E$        | $zpe$ | $\omega_i$ | $\omega_1$ |
|-----|-------------------------------------------------------------------------------------------|------------------|------------|-------|------------|------------|
| 1   | $trans\text{-HONO} \rightarrow cis\text{-HONO}$                                           | $C_1$            | -205.6169  | .0197 | 545i       | 633        |
| 2   | $trans\text{-HONO} \rightarrow \text{H-NO}_2$                                             | $C_s$            | -205.5352  | .0160 | 2337i      | 428        |
| 3   | $\text{NO}_2 + \text{H}_2 \rightarrow trans\text{-HONO} + \text{H}$                       | $C_s/{}^2A'$     | -206.1186  | .0180 | 1860i      | 268        |
| 4   | $\text{NO}_2 + \text{H}_2 \rightarrow cis\text{-HONO} + \text{H}$                         | $C_s/{}^2A'$     | -206.1300  | .0189 | 1960i      | 301        |
| 5   | $\text{NO}_2 + \text{H}_2 \rightarrow \text{H-NO}_2 + \text{H}$                           | $C_{2v}/{}^2A_1$ | -206.1252  | .0210 | 1292i      | 295        |
| 6   | $\text{NO}_2 + \text{HO}_2 \rightarrow trans\text{-HONO} + \text{O}_2$                    | $C_s/{}^3A''$    | -355.8677  | .0234 | 2336i      | 172        |
| 6b  | $\text{NO}_2 + \text{HO}_2 \rightarrow trans\text{-HONO} + \text{O}_2$                    | $C_s/{}^3A''$    | -355.8536  | .0215 | 3789i      | 25         |
| 7   | $\text{NO}_2 + \text{HO}_2 \rightarrow cis\text{-HONO} + \text{O}_2$                      | $C_1/{}^3A$      | -355.8649  | .0218 | 2947i      | 57         |
| 7b  | $\text{NO}_2 + \text{HO}_2 \rightarrow cis\text{-HONO} + \text{O}_2$                      | $C_s/{}^3A''$    | -355.8499  | .0228 | 2895i      | 148        |
| 8   | $\text{NO}_2 + \text{HO}_2 \rightarrow \text{H-NO}_2 + \text{O}_2$                        | $C_s/{}^3A''$    | -355.8654  | .0223 | 2468i      | 75         |
| 9   | $\text{NO}_2 + \text{HO}_2 \rightarrow \text{HO}_2\text{NO}_2$                            | $C_1/{}^1A$      | -355.8830  | .0281 | 273i       | 100        |
| 10  | $\text{NO}_2 + \text{HCHO} \rightarrow trans\text{-HONO} + \text{HCO}$                    | $C_s/{}^2A'$     | -319.4333  | .0322 | 1507i      | 56         |
| 11  | $\text{NO}_2 + \text{HCHO} \rightarrow cis\text{-HONO} + \text{HCO}$                      | $C_1/{}^2A$      | -319.4467  | .0335 | 1823i      | 66         |
| 12  | $\text{NO}_2 + \text{HCHO} \rightarrow \text{H-NO}_2 + \text{HCO}$                        | $C_s/{}^2A'$     | -319.4419  | .0340 | 2082i      | 31         |
| 13  | $\text{NO}_2 + \text{H}_2\text{O} \rightarrow trans\text{-HONO} + \text{OH}$              | $C_1/{}^2A$      | -281.3484  | .0267 | 2630i      | 138        |
| 13b | $\text{NO}_2 + \text{H}_2\text{O} \rightarrow trans\text{-HONO} + \text{OH}$              | $C_1/{}^2A$      | -281.3482  | .0264 | 2708i      | 140        |
| 14  | $\text{NO}_2 + \text{H}_2\text{O} \rightarrow cis\text{-HONO} + \text{OH}$                | $C_1/{}^2A$      | -281.3643  | .0302 | 2265i      | 189        |
| 15  | $\text{NO}_2 + \text{H}_2\text{O} \rightarrow \text{H-NO}_2 + \text{OH}$                  | $C_1/{}^2A'$     | -281.3532  | .0292 | 1140i      | 110        |
| 16  | $\text{NO}_2 + \text{H}_2\text{S} \rightarrow trans\text{-HONO} + \text{SH}$              | $C_1/{}^2A$      | -604.3507  | .0207 | 2063i      | 90         |
| 16b | $\text{NO}_2 + \text{H}_2\text{S} \rightarrow trans\text{-HONO} + \text{SH}$              | $C_1/{}^2A$      | -604.3506  | .0209 | 2083i      | 59         |
| 17  | $\text{NO}_2 + \text{H}_2\text{S} \rightarrow cis\text{-HONO} + \text{SH}$                | $C_1/{}^2A$      | -604.3729  | .0247 | 2030i      | 135        |
| 18  | $\text{NO}_2 + \text{H}_2\text{S} \rightarrow \text{H-NO}_2 + \text{SH}$                  | $C_s/{}^2A'$     | -604.3696  | .0246 | 1892i      | 106        |
| 19  | $\text{NO}_2 + \text{CH}_3\text{OH} \rightarrow trans\text{-HONO} + \text{CH}_2\text{OH}$ | $C_1/{}^2A$      | -320.6514  | .0586 | 1401i      | 105        |
| 19b | $\text{NO}_2 + \text{CH}_3\text{OH} \rightarrow trans\text{-HONO} + \text{CH}_2\text{OH}$ | $C_1/{}^2A$      | -320.6491  | .0579 | 1281i      | 22         |
| 20  | $\text{NO}_2 + \text{CH}_3\text{OH} \rightarrow cis\text{-HONO} + \text{CH}_2\text{OH}$   | $C_1/{}^2A$      | -320.6595  | .0585 | 1777i      | 45         |
| 21  | $\text{NO}_2 + \text{CH}_3\text{OH} \rightarrow \text{H-NO}_2 + \text{CH}_2\text{OH}$     | $C_1/{}^2A$      | -320.6573  | .0600 | 1895i      | 81         |
| 22  | $\text{NO}_2 + \text{CH}_3\text{OH} \rightarrow trans\text{-HONO} + \text{CH}_3\text{O}$  | $C_1/{}^2A$      | -320.6437  | .0572 | 3358i      | 123        |
| 23  | $\text{NO}_2 + \text{CH}_3\text{OH} \rightarrow cis\text{-HONO} + \text{CH}_3\text{O}$    | $C_1/{}^2A$      | -320.6537  | .0593 | 2491i      | 123        |
| 24  | $\text{NO}_2 + \text{CH}_3\text{OH} \rightarrow \text{H-NO}_2 + \text{CH}_3\text{O}$      | $C_1/{}^2A'$     | -320.6501  | .0581 | 2182i      | 10         |
| 25  | $\text{NO}_2 + \text{HBr} \rightarrow trans\text{-HONO} + \text{Br}$                      | $C_s/{}^2A'$     | -2779.6794 | .0169 | 2290i      | 122        |
| 26  | $\text{NO}_2 + \text{HBr} \rightarrow cis\text{-HONO} + \text{Br}$                        | $C_s/{}^2A'$     | -2779.6938 | .0160 | 1839i      | 121        |
| 27  | $\text{NO}_2 + \text{HBr} \rightarrow \text{H-NO}_2 + \text{Br}$                          | $C_{2v}/{}^2A_1$ | -2779.6875 | .0167 | 1288i      | 122        |
| 28  | $\text{NO}_2 + \text{HI} \rightarrow cis\text{-HONO} + \text{I}$                          | $C_s/{}^2A'$     | -216.9402  | .0148 | 1755i      | 74         |
| 29  | $\text{NO}_2 + \text{HI} \rightarrow \text{H-NO}_2 + \text{I}$                            | $C_{2v}/{}^2A_1$ | -216.9386  | .0155 | 1722i      | 129        |
| 30  | $\text{NO}_2 + trans\text{-HONO} \rightarrow trans\text{-HONO} + \text{NO}_2$             | $C_{2v}/{}^2B_2$ | -410.6171  | .0293 | 2238i      | 68         |
| 30b | $\text{NO}_2 + trans\text{-HONO} \rightarrow trans\text{-HONO} + \text{NO}_2$             | $C_{2h}/{}^2B_u$ | -410.6007  | .0280 | 4031i      | 24         |
| 31  | $\text{NO}_2 + trans\text{-HONO} \rightarrow cis\text{-HONO} + \text{NO}_2$               | $C_s/{}^2A'$     | -410.6149  | .0287 | 2319i      | 62         |
| 32  | $\text{NO}_2 + trans\text{-HONO} \rightarrow \text{H-NO}_2 + \text{NO}_2$                 | $C_s/{}^2A'$     | -410.6000  | .0285 | 2763i      | 42         |
| 33  | $\text{NO}_2 + cis\text{-HONO} \rightarrow cis\text{-HONO} + \text{NO}_2$                 | $C_{2h}/{}^2B_u$ | -410.6170  | .0275 | 2676i      | 9.9i       |
| 34  | $\text{NO}_2 + cis\text{-HONO} \rightarrow \text{H-NO}_2 + \text{NO}_2$                   | $C_s/{}^2A'$     | -410.6127  | .0285 | 2625i      | 52         |

Note: See footnote to Table S1.
