# Supplementary material for: Iso-nitrous acid: spectral frequencies and possible synthetic pathwaysElectronic Supplementary Information available. See http://www.rsc.org/suppdata/cp/b1/b107637j/
Source: Royal Society of Chemistry journal article supplement (doi:10.1039/b107637j), 2002-01-17
Supplement: table_s3.pdf [file table_s3.pdf]

**Table S3** Supplementary data: X–H bond distances, X–H–Y bond distances and angles for  $XH + Y \rightarrow X-H-Y \rightarrow X + YH$ ; distances in Å, angles in degrees

| XH                 | R(X–H)                       |        | R(X–H) | R(H–Y) | ∠ X–H–Y |
|--------------------|------------------------------|--------|--------|--------|---------|
| H <sub>2</sub>     | H–H (0.7384)                 | TS3    | 0.8715 | 1.2369 | 173.6   |
|                    |                              | TS4    | 0.9873 | 1.1483 | 173.7   |
|                    |                              | TS5    | 1.1803 | 1.1226 | 180.0   |
| HO <sub>2</sub>    | O–H (0.9605)                 | TS6    | 1.1324 | 1.2605 | 158.0   |
|                    |                              | TS6b   | 1.1046 | 1.2725 | 177.3   |
|                    |                              | TS7    | 1.1097 | 1.2984 | 178.1   |
|                    |                              | TS7b   | 1.1015 | 1.3155 | 167.2   |
|                    |                              | TS8    | 1.1080 | 1.3760 | 165.1   |
| HCHO               | C–H (1.0986)                 | TS10   | 1.2054 | 1.3764 | 176.3   |
|                    |                              | TS11   | 1.2845 | 1.2959 | 173.5   |
|                    |                              | TS12   | 1.3931 | 1.2658 | 174.1   |
| H <sub>2</sub> O   | O–H (0.9502)                 | TS13   | 1.1393 | 1.1629 | 154.4   |
|                    |                              | TS13b  | 1.1364 | 1.1696 | 155.7   |
|                    |                              | TS14   | 1.2247 | 1.1617 | 158.0   |
|                    |                              | TS15   | 1.3704 | 1.1139 | 169.5   |
| H <sub>2</sub> S   | S–H (1.3362)                 | TS16   | 1.4624 | 1.3244 | 164.2   |
|                    |                              | TS16b  | 1.4609 | 1.3243 | 162.0   |
|                    |                              | TS17   | 1.5488 | 1.2866 | 158.7   |
|                    |                              | TS18   | 1.6439 | 1.2168 | 177.4   |
| CH <sub>3</sub> OH | C–H (1.0832, 1.0901, 1.0901) | TS19   | 1.2127 | 1.3664 | 160.9   |
|                    |                              | TS20   | 1.2885 | 1.2794 | 177.8   |
|                    |                              | TS21   | 1.3968 | 1.2568 | 154.6   |
|                    |                              | TS19b  | 1.2009 | 1.3745 | 172.1   |
|                    | O–H (0.9493)                 | TS22   | 1.1348 | 1.2102 | 162.3   |
| TS23               |                              | 1.1641 | 1.2211 | 159.9  |         |
| TS24               |                              | 1.2482 | 1.1772 | 168.1  |         |
| HBr                | Br–H (1.4137)                | TS25   | 1.7009 | 1.1977 | 148.6   |
|                    |                              | TS26   | 1.6708 | 1.2091 | 162.7   |
|                    |                              | TS27   | 1.7655 | 1.1759 | 180.0   |
| HI                 | I–H (1.6042)                 | TS28   | 1.8067 | 1.3062 | 170.1   |
|                    |                              | TS29   | 1.8160 | 1.3479 | 180.0   |
| <i>trans</i> -HONO | O–H (0.9549)                 | TS30   | 1.1908 | 1.1908 | 161.7   |
|                    |                              | TS31   | 1.1808 | 1.1808 | 180.0   |
|                    |                              | TS32   | 1.1535 | 1.2399 | 172.2   |
| <i>cis</i> -HONO   | O–H (0.9658)                 | TS33   | 1.1593 | 1.3148 | 155.9   |
| HNO <sub>2</sub>   | N–H (1.0315)                 | TS34   | 1.1975 | 1.1975 | 180.0   |
|                    |                              | TS35   | 1.2318 | 1.2465 | 179.4   |

Notes:

YH is H-NO<sub>2</sub>, *trans*- or *cis*-HONO.

All values obtained at BHandHLYP/6-311G(d,p) level except HI + NO<sub>2</sub> for which BHandHLYP/SDD values are provided.
