# Supplementary material for: Iso-nitrous acid: spectral frequencies and possible synthetic pathwaysElectronic Supplementary Information available. See http://www.rsc.org/suppdata/cp/b1/b107637j/
Source: Royal Society of Chemistry journal article supplement (doi:10.1039/b107637j), 2002-01-17
Supplement: table_s4.pdf [file table_s4.pdf]

**Table S4** QCISD/6-311++G(2df,2p) geometries for nitrogen dioxide and nitrous acid isomers; distances in Å, angles in degrees

|                    |         |                                |
|--------------------|---------|--------------------------------|
| NO <sub>2</sub>    | R(N-O)  | 1.189<br>(1.195 <sup>a</sup> ) |
|                    | ∠ O-N-O | 134.9<br>(133.9 <sup>a</sup> ) |
| <i>trans</i> -HONO | R(H-O)  | 0.964                          |
|                    | R(HO-N) | 1.409                          |
|                    | R(ON-O) | 1.168                          |
|                    | ∠ H-O-N | 102.7                          |
|                    | ∠ O-N-O | 110.9                          |
| <i>cis</i> -HONO   | R(H-O)  | 0.973                          |
|                    | R(HO-N) | 1.379                          |
|                    | R(ON-O) | 1.180                          |
|                    | ∠ H-O-N | 105.3                          |
|                    | ∠ O-N-O | 113.5                          |
| HNO <sub>2</sub>   | R(H-N)  | 1.033                          |
|                    | R(N-O)  | 1.211                          |
|                    | ∠ H-N-O | 115.8                          |
|                    | ∠ O-N-O | 128.3                          |

Note:

<sup>a</sup> A. Cabana, M. Laurin, W. J. Lafferty and R. L. Sams, *Can. J. Phys.*, 1975, **53**, 1902.
